# Supplementary material
Source: publisher figshare collection journal article supplement (https://acs.figshare.com/ndownloader/files/4175125)
Supplement: Supplementary file 1 [file 4175125]

## **Colorful InAs Nanowire Arrays: From Strong to Weak Absorption with Geometrical Tuning --- Supporting Information**

Phillip M Wu<sup>†\*‡</sup>, Nicklas Anttu<sup>†\*‡</sup>, H. Q. Xu<sup>‡§</sup>, Lars Samuelson<sup>‡</sup>, Mats-Erik Pistol<sup>‡</sup>

<sup>‡</sup>Division of Solid State Physics and The Nanometer Structure Consortium (nmC@LU), Lund University, Box 118, S – 22100 Lund, Sweden

<sup>§</sup>Key Laboratory for the Physics and Chemistry of Nanodevices and Department of Electronics, Peking University, Beijing 100871, China

Keywords: InAs, vertical nanowire array, reflectance, absorptance, photodetection, photovoltaics

<sup>†</sup>These authors contributed equally to this work and are co-first authors.

\*To whom correspondence should be addressed: [nicklas.anttu@ftf.lth.se](mailto:nicklas.anttu@ftf.lth.se),  
[phillip.wu@ftf.lth.se](mailto:phillip.wu@ftf.lth.se)

## **Nanowire Growth Details**

Samples with prepared Au dot lattices were placed in the CBE unit, and TertiaryButylArsine (TBA) was thermally cracked into As and the growth chamber was maintained at As ambient of 1.5 mbar. At the growth temperature of 425 °C, 0.15 mbar of TriMethylIndium (TMIn) was introduced to initiate growth of NWs. The growth rate was typically 60 nm/minute.<sup>1</sup> Once the targeted nanowire length was achieved, the TMIn flow to chamber was shut and the samples were allowed to cool to nearly room temperature in As ambient background. The samples with grown nanowires were then removed from the CBE unit.

## **Effect of Au catalyst on reflectance**

It is known that Au particles of similar shape and dimensions as the catalyst particles can support (localized) surface plasmon polariton resonances that can have a strong effect on the scattering of light. However, such effects are usually studied in a system where the Au particles are in a non-absorbing dielectric surrounding. In the present study of InAs NWs, the Au particles reside on top of the semiconducting InAs, and this work considers the wavelength region where the InAs absorbs light. This is expected to strongly limit the possibility for resonant excitation of surface plasmon polaritons. To show that this is indeed the case, we show in Fig. S1 the modeled<sup>2</sup> reflectance of NW arrays with and without hemispherical Au<sup>3</sup> particles. It is clearly seen that the Au particles cause only a minor modification of the reflectance, and no signs of surface plasmon polariton resonances are seen.

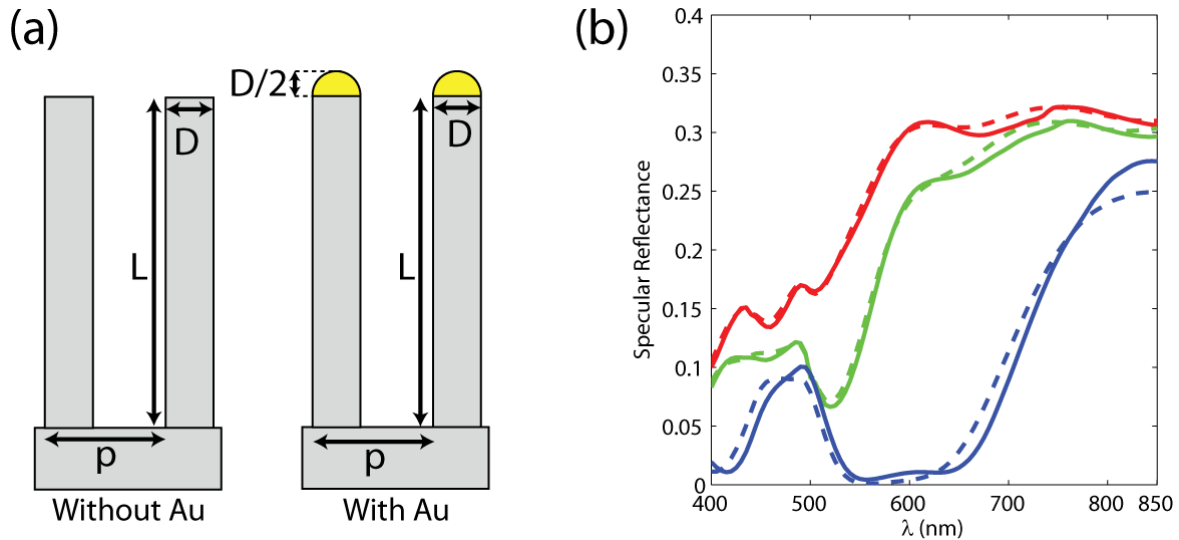

**Figure S1.** Effect of Au particle on the reflectance of the systems considered in Figure 2 and Figure 3 in the main text. (a) Left: Schematic of modeled InAs NWs with no Au particle at the top. Right: Schematic of modeled InAs NWs with a hemispherical Au particle at the top. (b) Modeled specular reflectance of normally incident light onto an InAs NW array of (red)  $D = 62.2$  nm,  $p = 435$  nm, and  $L = 1440$  nm; (green)  $D = 73$  nm,  $p = 500$  nm, and  $L = 1408$  nm; and (blue)  $D = 100$  nm,  $p = 320$  nm, and  $L = 690$  nm. Solid (dashed) lines are for NWs with (without) a hemispherical Au particle at the top.

| D (nm) | P (nm) | L (nm) |
|--------|--------|--------|
| 39.6   | 895    | 5956   |
| 45.2   | 710    | 4486   |
| 47.2   | 415    | 2882   |
| 50.9   | 305    | 1646   |
| 50.9   | 335    | 1896   |
| 56.5   | 855    | 3858   |
| 56.5   | 859    | 3004   |
| 56.5   | 863    | 4698   |
| 56.5   | 318    | 1382   |
| 56.8   | 640    | 3692   |
| 62.2   | 730    | 3606   |
| 62.2   | 650    | 2400   |
| 62.2   | 410    | 1394   |
| 62.2   | 760    | 2852   |
| 62.2   | 422    | 1848   |
| 62.2   | 318    | 1218   |
| 62.2   | 435    | 1444   |
| 62.5   | 534    | 1922   |
| 62.5   | 415    | 1570   |
| 64.4   | 327    | 1080   |
| 67.9   | 630    | 2310   |
| 68.0   | 320    | 1084   |
| 68.0   | 413    | 1772   |
| 68.0   | 425    | 1746   |
| 71.5   | 330    | 1106   |
| 73.4   | 500    | 1408   |
| 73.4   | 515    | 1658   |
| 73.4   | 430    | 1244   |
| 73.4   | 420    | 1620   |
| 73.4   | 315    | 892    |
| 74.3   | 438    | 1634   |
| 79.1   | 614    | 1960   |
| 79.1   | 430    | 1332   |
| 79.3   | 330    | 916    |
| 84.8   | 440    | 1018   |
| 84.8   | 416    | 1194   |
| 84.8   | 325    | 816    |
| 90.9   | 440    | 1142   |
| 90.9   | 426    | 1142   |
| 90.9   | 310    | 842    |
| 100.0  | 320    | 690    |
| 101.7  | 320    | 704    |

**Table S1.** Nanowire diameter  $D$ , nanowire length  $L$ , and array period  $P$  of the 42 nanowire arrays considered in this study.

1. Jensen, L. E.; Bjork, M. T.; Jeppesen, S.; Persson, A. I.; Ohlsson, B. J.; Samuelson, L., Role of Surface Diffusion in Chemical Beam Epitaxy of InAs Nanowires. *Nano Letters* **2004**, *4* (10), 1961-1964.
2. Anttu, N.; Xu, H. Q., Scattering matrix method for optical excitation of surface plasmons in metal films with periodic arrays of subwavelength holes. *Phys. Rev. B* **2011**, *83*, 165431.
3. Johnson, P. B.; Christy, R. W., Optical Constants of the Noble Metals. *Physical Review B* **1972**, *6* (12), 4370-4379.
